# Supplementary material
Source: PubMed Central journal article supplement (PMC3670799)
Supplement: NIHMS473718-supplement-supplement_1.pdf [file NIHMS473718-supplement-supplement_1.pdf]

1 Supplementary Table S1. Laboratory colonies of *A. gambiae* used in this study.

2

| <b>Colony</b> | <b>Molecular Form</b> | <b>Geographic Origin (Year)</b> | <b>Karyotype</b> |
|---------------|-----------------------|---------------------------------|------------------|
| M-GA-CAM      | M                     | Yaounde, Cameroon (1988)        | 2L+;2R+          |
| Mali-NIH      | M                     | Niono, Mali (2005)              | 2La; 2Rbc        |
| Pimperena     | S                     | Pimperena, Mali (2005)          | 2La/+; 2Rb       |
| KIST          | S                     | Kisumu, Kenya (1975)            | 2L+;2R+          |

1 Supplementary Table S2. Localities where *A. gambiae* was sampled in  
2 Burkina Faso and Cameroon.

| <b>Village</b> | <b>Ecological Zone</b>    | <b>Geographic Coordinates</b> |
|----------------|---------------------------|-------------------------------|
| Burkina Faso:  |                           |                               |
| Koubri         | Sudan savanna             | 12°11'N, 01°23'E              |
| Masgo          | Sudan savanna             | 11°84'N, 01°25'E              |
| Cameroon:      |                           |                               |
| Nkolbisson     | Equatorial forest         | 03°52'N, 11°27'E              |
| Leboudi        | Equatorial forest         | 03°55'N, 11°26'E              |
| Ngousso        | Equatorial forest         | 03°53'N, 11°32'E              |
| Obala          | Forest-Savanna transition | 04°09'N, 11°32'E              |

1 **Supplementary Table S3. Primer sequences used for qRT-PCR analyses**

| Gene ID    | Primer Name | Sequence (5'-3')            | Amplicon length (bp) |
|------------|-------------|-----------------------------|----------------------|
| AGAP004690 | Ag2L387 F   | CTACTGGGCGTTGCATATTCC       | 64                   |
|            | Ag2L387 R   | CGAGGCCATTGCTGTAAGTCA       |                      |
| AGAP004572 | 2R1354 F    | CGGACAGAACTGCCTGTACGT       | 69                   |
|            | 2R1354 R    | GCGTCCGTGTCCGAGAAC          |                      |
| AGAP001030 | AgX212 F    | ACGCACGCTTCTTCAGTATCC       | 70                   |
|            | AgX212 R    | CTTACCATCGTGGACCTTGT        |                      |
| AGAP004799 | Ag2L25F     | CGATAAGAATGGCAACATTGCA      | 66                   |
|            | Ag2L25R     | CCGGTTCCCGAATGATTGT         |                      |
| AGAP006076 | 2L93 R      | GCCTCCTCGCGTATCTTATCC       | 64                   |
|            | 2L93 F      | AAGAGGCGATTGCCAAAGC         |                      |
| AGAP001036 | X213 F      | CGCATCTGGGACATGAATTCT       | 63                   |
|            | X213 R      | CGGGCTCTGGCAGTCAA           |                      |
| AGAP012320 | 3L14 F      | CGCGAGCGCATTGAATC           | 52                   |
|            | 3L14 R      | CGTCCGCCTCCTGGAAAGT         |                      |
| AGAP004817 | 2L543-1 F3  | CAACAGATGCCACAAAATGC        | 81                   |
|            | 2L543-1 R3  | CGCTGAACCATATCCTCCTGTAT     |                      |
| AGAP009194 | 3R26 F      | CGGACCGACCATGACGAT          | 69                   |
|            | 3R26 R      | GGCACACACCCATAATGC          |                      |
| AGAP001082 | X50-2 F     | CCAGCTTAGATGTCGAGATATTTGC   | 68                   |
|            | X50-2 R     | TTTATCACCCCGCGCTGTA         |                      |
| AGAP001091 | AgUNKN168 F | ACCGGTCGAGCCTCTAGGA         | 77                   |
|            | AgUNKN168 R | CCCAGGCCAAATACAAATCG        |                      |
| AGAP000959 | AgX1091 F   | GGTTTGAGTCATGTGCGCTTT       | 62                   |
|            | AgX1091 R   | TCCCCTGTCGAGGATGAAG         |                      |
| AGAP001090 | AgUNKN137 F | CAGCGCCAAGAAAATGCAT         | 75                   |
|            | AgUNKN137 R | TTGGTCTTTTATGAGCCAGTTGTC    |                      |
| AGAP004050 | 2R 3535 F   | CAGCGGGCACTGAACGA           | 69                   |
|            | 2R 3535 R   | CTCTGATAGCTTTGGTATGTGAATGTT |                      |
